# Supplementary material
Source: MDPI journal article supplement (https://www.mdpi.com/2073-4352/12/1/53)
Supplement: s1 [file s1]

## Supplementary Materials

### Preparation of 1,3,5-tris(bromomethyl)-2,4,6-trimethylbenzene

To a mixture of mesitylene (12.0 g; 0.10 mol), paraformaldehyde (10.0 g; 0.33 mol), and 50 mL of glacial acetic acid was added 20 mL of a 31 wt% HBr/acetic acid solution rapidly. The mixture was kept for 12 h at 368 K and then poured into 500 mL of water. The product was filtered off on a G3 glass frit and dried in vacuum. The yield was 36.3 g (91 %) of 1,3,5-tris(bromomethyl)-2,4,6-trimethylbenzene as a white powder.

### Preparation of 1,3,5-Tri(triazol-1-ylmethyl)-2,4,6-trimethylbenzene (tttmb)

Triazole (2.76 g, 40 mmol) was dissolved in dry acetonitrile (50 mL), and anhydrous potassium carbonate (10 g) was added to the above solution. After 2 h of stirring, 1,3,5-tris(bromomethyl)-2,4,6-trimethylbenzene (4.0 g, 10 mmol) was added. The mixture was then vigorously stirred and refluxed for 12 h at 353 K. A white residue was obtained after filtering and evaporating the filtrate in a vacuum. The crude product was recrystallized from water and then ethanol/hexane (1:1) to give white crystalline product. Yield: 82%.

**Table S1.** Selected bond lengths /Å and angles /° for **1-3**.

| Complex 1           |            |                     |            |
|---------------------|------------|---------------------|------------|
| N(7)-Cd(1)#1        | 2.338(8)   | N(3)-Cd(1)#2        | 2.307(9)   |
| O(3)-Cd(1)#3        | 2.460(7)   | O(4)-Cd(1)#3        | 2.412(8)   |
| N(4)-Cd(1)          | 2.349(9)   | O(1)-Cd(1)          | 2.459(7)   |
| O(2)-Cd(1)          | 2.452(7)   | Cd(1)-N(3)#4        | 2.307(9)   |
| Cd(1)-N(7)#5        | 2.338(8)   | Cd(1)-O(4)#6        | 2.412(8)   |
| Cd(1)-O(3)#6        | 2.460(7)   | N(3)#4-Cd(1)-N(7)#5 | 178.0(4)   |
| N(3)#4-Cd(1)-N(4)   | 93.4(4)    | N(7)#5-Cd(1)-N(4)   | 84.6(4)    |
| N(3)#4-Cd(1)-O(4)#6 | 86.5(3)    | N(7)#5-Cd(1)-O(4)#6 | 92.9(3)    |
| N(4)-Cd(1)-O(4)#6   | 84.4(3)    | N(3)#4-Cd(1)-O(2)   | 93.4(3)    |
| N(7)#5-Cd(1)-O(2)   | 86.8(3)    | N(4)-Cd(1)-O(2)     | 84.5(3)    |
| O(4)#6-Cd(1)-O(2)   | 168.9(3)   | N(3)#4-Cd(1)-O(3)#6 | 92.1(4)    |
| N(7)#5-Cd(1)-O(3)#6 | 89.2(3)    | N(4)-Cd(1)-O(3)#6   | 136.8(3)   |
| O(4)#6-Cd(1)-O(3)#6 | 53.1(2)    | O(2)-Cd(1)-O(3)#6   | 137.9(3)   |
| N(3)#4-Cd(1)-O(1)   | 87.1(3)    | N(7)#5-Cd(1)-O(1)   | 94.7(3)    |
| N(4)-Cd(1)-O(1)     | 136.8(3)   | O(4)#6-Cd(1)-O(1)   | 138.5(2)   |
| O(2)-Cd(1)-O(1)     | 52.5(2)    | O(3)#6-Cd(1)-O(1)   | 86.2(2)    |
| Complex 2           |            |                     |            |
| Cd(1)-N(5)#1        | 2.288(5)   | Cd(1)-N(1)          | 2.318(5)   |
| Cd(1)-O(5)          | 2.346(5)   | Cd(1)-O(4)#2        | 2.354(5)   |
| Cd(1)-O(2)          | 2.370(6)   | Cd(1)-O(1)          | 2.471(5)   |
| Cd(1)-O(3)#2        | 2.570(5)   | N(5)-Cd(1)#3        | 2.288(5)   |
| O(3)-Cd(1)#4        | 2.570(5)   | O(4)-Cd(1)#4        | 2.354(5)   |
| N(5)#1-Cd(1)-N(1)   | 168.69(19) | N(5)#1-Cd(1)-O(5)   | 86.40(19)  |
| N(1)-Cd(1)-O(5)     | 84.8(2)    | N(5)#1-Cd(1)-O(4)#2 | 91.3(2)    |
| N(1)-Cd(1)-O(4)#2   | 90.0(2)    | O(5)-Cd(1)-O(4)#2   | 135.4(2)   |
| N(5)#1-Cd(1)-O(2)   | 94.0(2)    | N(1)-Cd(1)-O(2)     | 97.3(2)    |
| O(5)-Cd(1)-O(2)     | 143.0(2)   | O(4)#2-Cd(1)-O(2)   | 81.6(2)    |
| N(5)#1-Cd(1)-O(1)   | 94.3(2)    | N(1)-Cd(1)-O(1)     | 92.9(2)    |
| O(5)-Cd(1)-O(1)     | 91.1(2)    | O(4)#2-Cd(1)-O(1)   | 133.43(18) |
| O(2)-Cd(1)-O(1)     | 51.9(2)    | N(5)#1-Cd(1)-O(3)#2 | 83.96(18)  |
| N(1)-Cd(1)-O(3)#2   | 87.89(19)  | O(5)-Cd(1)-O(3)#2   | 82.6(2)    |

|                     |            |                   |          |
|---------------------|------------|-------------------|----------|
| O(4)#2-Cd(1)-O(3)#2 | 52.89(17)  | O(2)-Cd(1)-O(3)#2 | 134.3(2) |
| O(1)-Cd(1)-O(3)#2   | 173.59(19) |                   |          |

## Complex 3

|                     |            |                     |            |
|---------------------|------------|---------------------|------------|
| N(6)-Cd(1)#1        | 2.305(5)   | N(9)-Cd(1)#2        | 2.377(5)   |
| O(4)-Cd(1)#3        | 2.396(5)   | O(3)-Cd(1)#3        | 2.424(6)   |
| Cd(1)-N(6)#4        | 2.305(5)   | Cd(1)-O(2)          | 2.304(5)   |
| Cd(1)-N(1)          | 2.340(5)   | Cd(1)-N(9)#5        | 2.377(5)   |
| Cd(1)-O(4)#6        | 2.396(5)   | Cd(1)-O(3)#6        | 2.424(6)   |
| Cd(1)-O(1)          | 2.595(5)   | N(6)#4-Cd(1)-O(2)   | 130.09(17) |
| N(6)#4-Cd(1)-N(1)   | 94.6(2)    | O(2)-Cd(1)-N(1)     | 85.40(19)  |
| N(6)#4-Cd(1)-N(9)#5 | 92.08(19)  | O(2)-Cd(1)-N(9)#5   | 87.35(19)  |
| N(1)-Cd(1)-N(9)#5   | 172.28(18) | N(6)#4-Cd(1)-O(4)#6 | 83.28(19)  |
| O(2)-Cd(1)-O(4)#6   | 146.12(17) | N(1)-Cd(1)-O(4)#6   | 99.12(19)  |
| N(9)#5-Cd(1)-O(4)#6 | 85.5(2)    | N(6)#4-Cd(1)-O(3)#6 | 136.05(19) |
| O(2)-Cd(1)-O(3)#6   | 93.83(18)  | N(1)-Cd(1)-O(3)#6   | 86.37(18)  |
| N(9)#5-Cd(1)-O(3)#6 | 91.47(19)  | O(4)#6-Cd(1)-O(3)#6 | 53.39(18)  |
| N(6)#4-Cd(1)-O(1)   | 77.63(17)  | O(2)-Cd(1)-O(1)     | 52.47(15)  |
| N(1)-Cd(1)-O(1)     | 90.06(17)  | N(9)#5-Cd(1)-O(1)   | 87.62(17)  |
| O(4)#6-Cd(1)-O(1)   | 159.43(17) | O(3)#6-Cd(1)-O(1)   | 146.30(17) |

Symmetry transformations used to generate equivalent atoms in (1): #1  $-x, y - 1/2, -z + 3/2$ ; #2  $x - 1/2, -y + 3/2, -z + 2$ ; #3  $x + 1/2, -y + 5/2, -z + 2$ ; #4  $x + 1/2, -y + 3/2, -z + 2$ ; #5  $-x, y + 1/2, -z + 3/2$ ; #6  $x - 1/2, -y + 5/2, -z + 2$ ; (2): #1  $x + 1/2, -y + 1/2, z + 1/2$ ; #2  $-x + 3/2, y + 1/2, -z + 3/2$ ; #3  $x - 1/2, -y + 1/2, z - 1/2$ ; #4  $-x + 3/2, y - 1/2, -z + 3/2$ ; (3): #1  $x, -y + 1, z + 1/2$ ; #2  $x + 1/2, -y + 1/2, z + 1/2$ ; #3  $-x + 3/2, y + 1/2, -z - 1/2$ ; #4  $x, -y + 1, z - 1/2$ ; #5  $x - 1/2, -y + 1/2, z - 1/2$ ; #6  $-x + 3/2, y - 1/2, -z - 1/2$ .

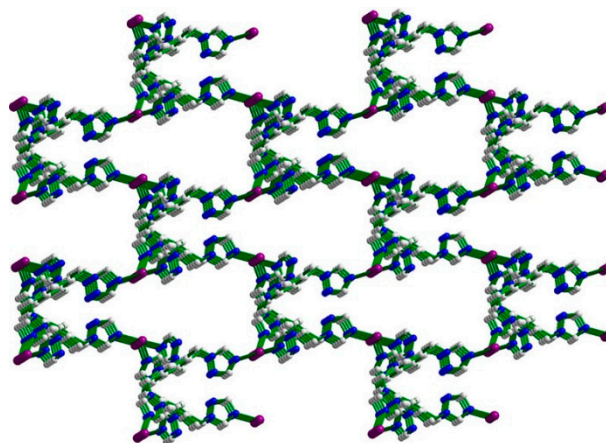

Figure S1. The 3D framework of complex 3.

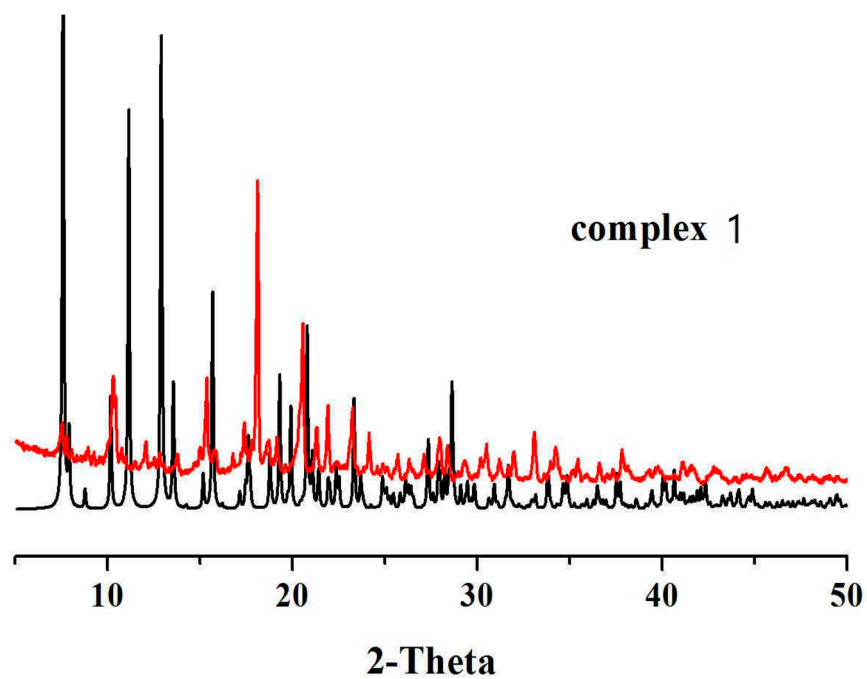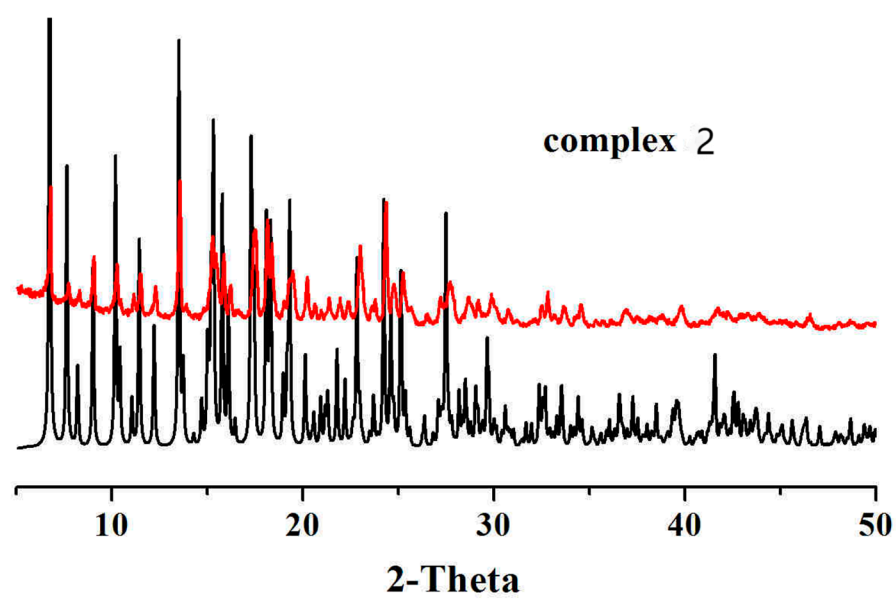

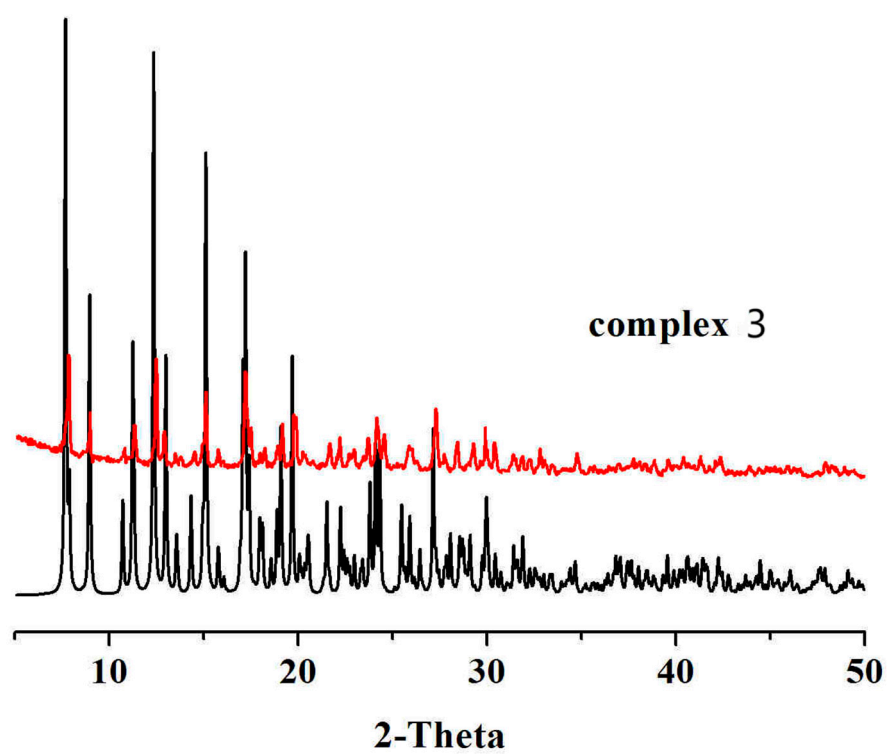

**Figure S2.** Experimental (red) and simulated (black) PXRD patterns of 1–3.
